# Supplementary material for: Autism-related KLHL17 and SYNPO act in concert to control activity-dependent dendritic spine enlargement and the spine apparatus
Source: PubMed Central journal article supplement (PMC10499226; doi:10.1371/journal.pbio.3002274), 2023-08-31

Fig. 1A

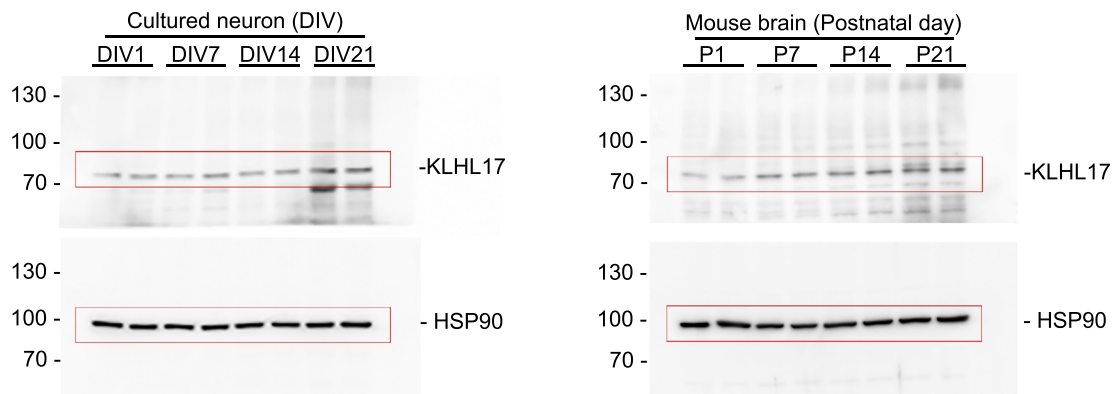

Fig. 1C

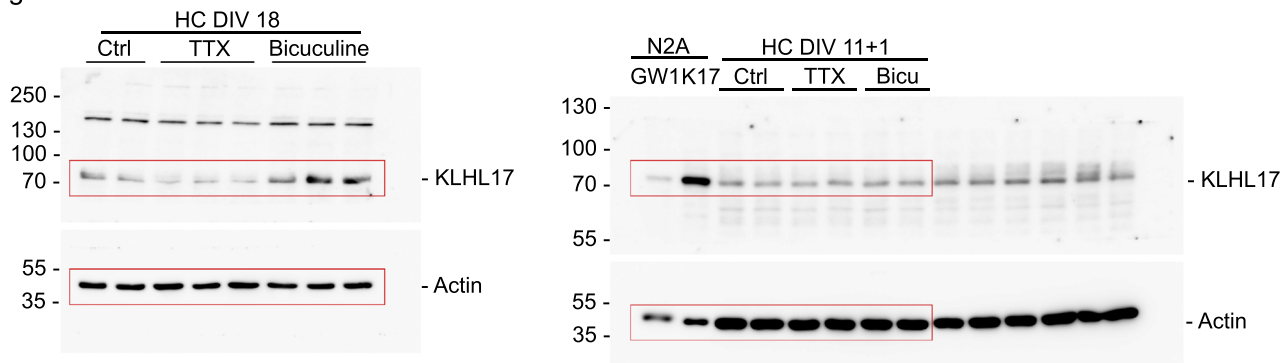

Fig. 1J

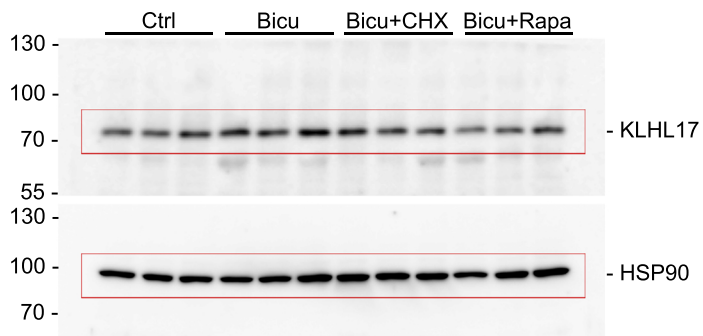

Fig. 3D

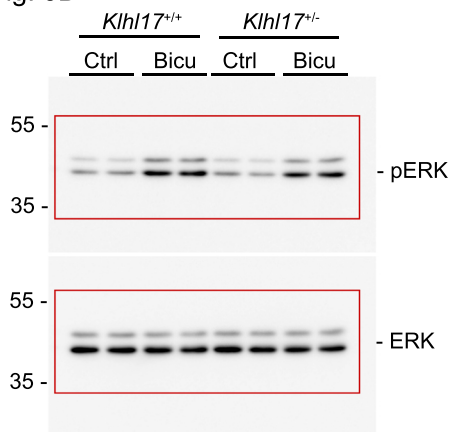

Fig. 6E

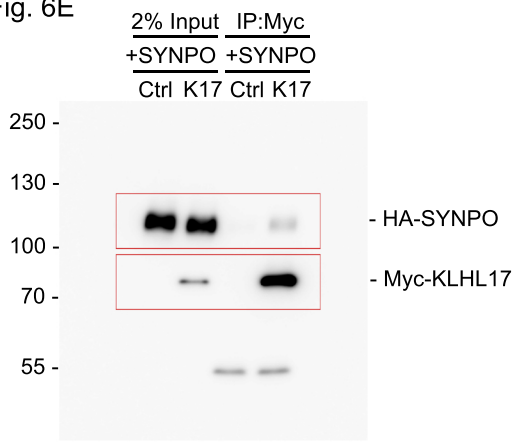

Fig. 8B

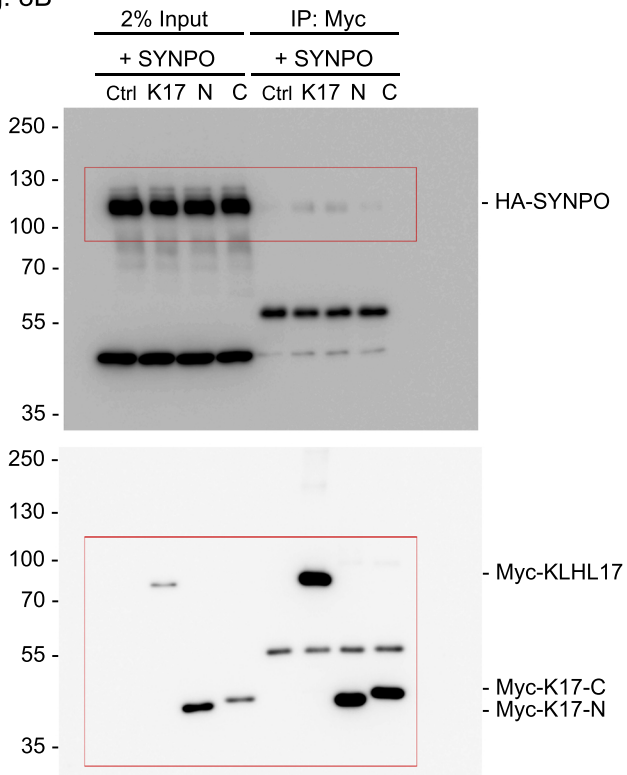

Fig. 8C

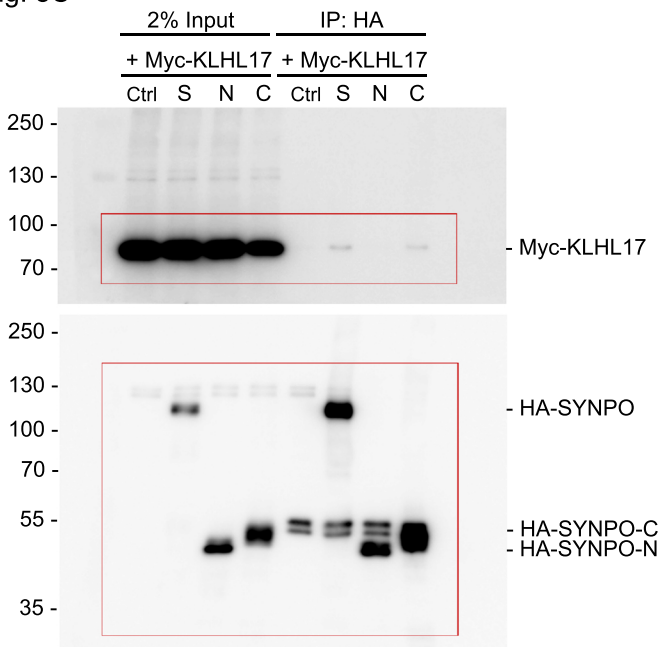

Supplement: pbio.3002274.s005.pdf [file pbio.3002274.s005.pdf]
